# Supplementary material
Source: PubMed Central journal article supplement (PMC9329463)
Supplement: 41598_2022_15013_MOESM1_ESM.pdf [file 41598_2022_15013_MOESM1_ESM.pdf]

## Appendix A. Distribution of COVID-19 affected patients in the collected dataset

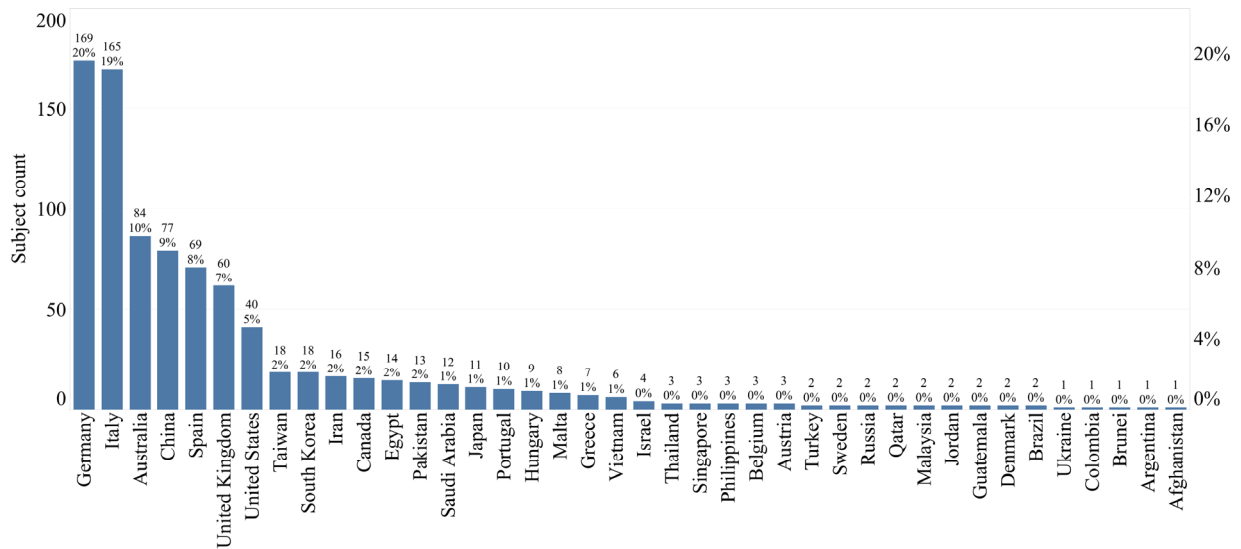

Figure A1. Representation of COVID-19 patients by country

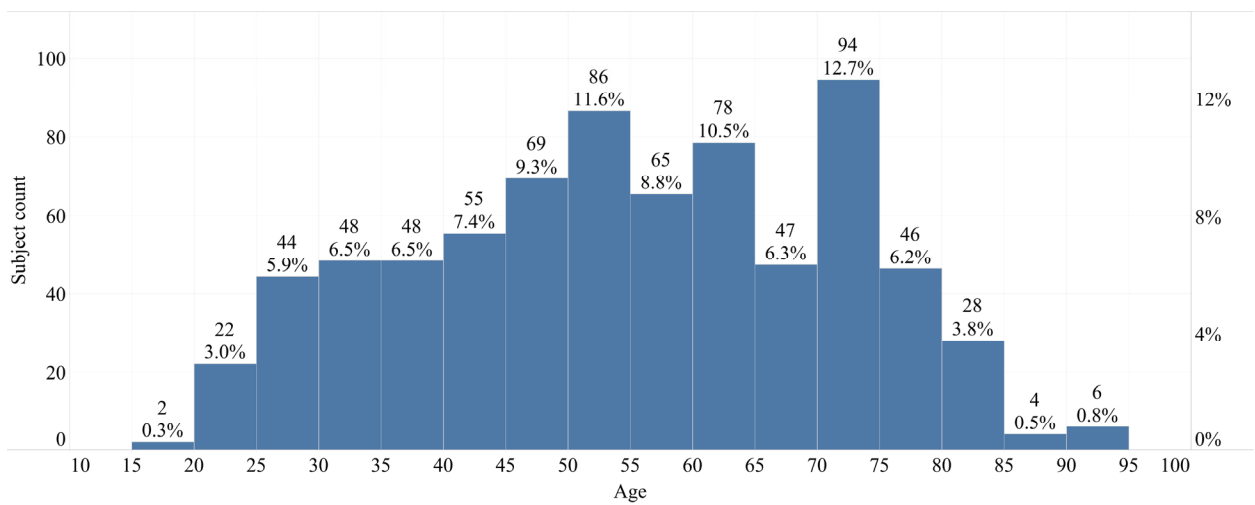

Figure A2. Representation of COVID-19 patients by age
