# Supplementary material
Source: PubMed Central journal article supplement (PMC9329463)
Supplement: 41598_2022_15013_MOESM3_ESM.pdf [file 41598_2022_15013_MOESM3_ESM.pdf]

## Appendix C. Tuning of hyperparameters

Table C1. Hyperparameters used during the networks' optimization

| Hyperparameter           | Value                                                                                                                                                                                                                                                                                              | Count |
|--------------------------|----------------------------------------------------------------------------------------------------------------------------------------------------------------------------------------------------------------------------------------------------------------------------------------------------|-------|
| Model                    | U-net, U-net++, DeepLabV3,<br>DeepLabV3+, FPN, Linknet,<br>PSPNet, PAN, MA-Net                                                                                                                                                                                                                     | 9     |
| Encoder                  | ResNet-50, ResNet-101,<br>ResNeXt-50, ResNeXt-101,<br>RegNetX-32, RegNetX-64,<br>RegNetY-32, RegNetY-64,<br>SE-ResNet-50, SE-ResNet-101,<br>SE-ResNeXt-50, SE-ResNeXt-101,<br>EfficientNet B0, EfficientNet B1, EfficientNet B2,<br>MobileNet V2,<br>SK-ResNet-34, SK-ResNet-50,<br>DPN-68, DPN-98 | 20    |
| Input size               | 384x384 to 640x640 with the step of 32x32 px                                                                                                                                                                                                                                                       | 9     |
| Loss<br>(classification) | Binary cross-entropy, L1, Smooth L1                                                                                                                                                                                                                                                                | 3     |
| Loss<br>(segmentation)   | Dice, Jaccard, Binary cross-entropy,<br>Binary cross-entropy with logits, Lovász, Focal                                                                                                                                                                                                            | 6     |
| Optimizer                | SGD, RMSprop,<br>Adam, AdamW,<br>Adam (AMSGrad), AdamW (AMSGrad)                                                                                                                                                                                                                                   | 6     |
| Learning rate            | 0.01, 0.005, 0.001, 0.0005, 0.0001                                                                                                                                                                                                                                                                 | 5     |

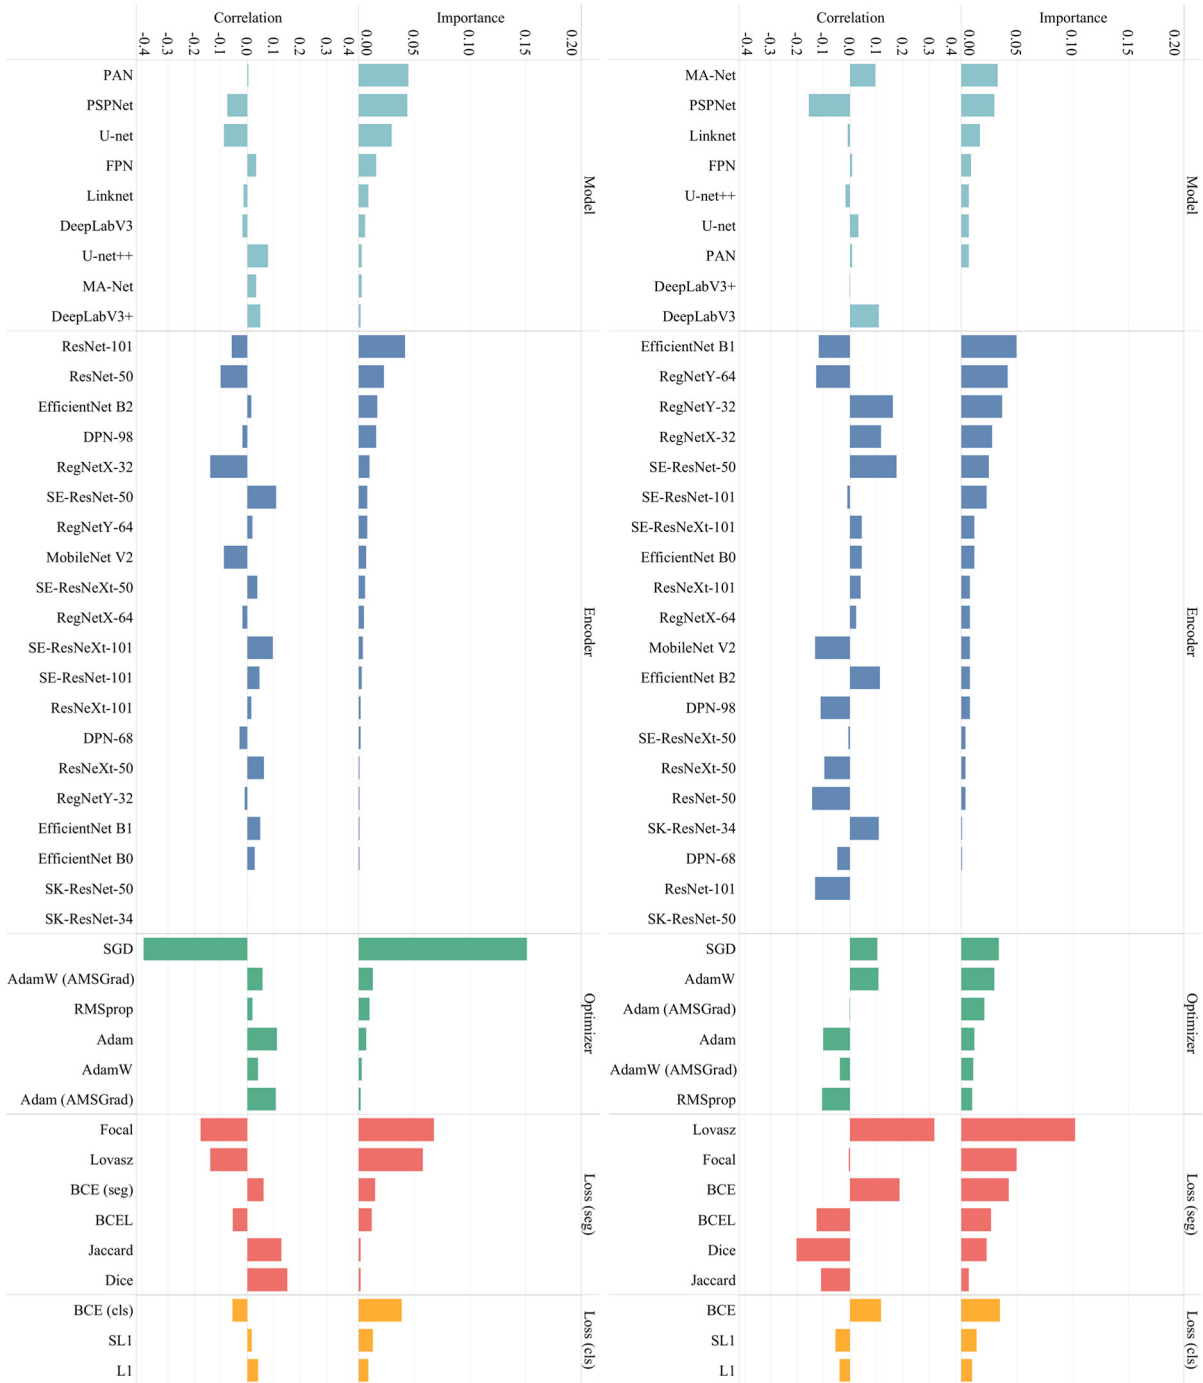

Stage I: Lungs segmentation

Stage II: Disease segmentation

Figure C1. Correlation and importance for the tuning of networks during both stages
