# Supplementary material
Source: PubMed Central journal article supplement (PMC9329463)
Supplement: 41598_2022_15013_MOESM4_ESM.pdf [file 41598_2022_15013_MOESM4_ESM.pdf]

**Appendix D.** Extended results for the trained, validated, and tested networks in both stages

Table D1. Results of the lung segmentation networks on Stage I

| Model      | Accuracy |       |       | Precision |       |       | Recall |       |       | DSC   |       |       |
|------------|----------|-------|-------|-----------|-------|-------|--------|-------|-------|-------|-------|-------|
|            | Train    | Val   | Test  | Train     | Val   | Test  | Train  | Val   | Test  | Train | Val   | Test  |
| U-net      | 0.972    | 0.975 | 0.976 | 0.963     | 0.958 | 0.961 | 0.958  | 0.962 | 0.963 | 0.960 | 0.960 | 0.962 |
| U-net++    | 0.968    | 0.974 | 0.975 | 0.957     | 0.959 | 0.962 | 0.954  | 0.959 | 0.959 | 0.956 | 0.959 | 0.960 |
| DeepLabV3  | 0.972    | 0.974 | 0.975 | 0.962     | 0.965 | 0.968 | 0.957  | 0.955 | 0.955 | 0.960 | 0.960 | 0.961 |
| DeepLabV3+ | 0.973    | 0.975 | 0.976 | 0.965     | 0.965 | 0.969 | 0.958  | 0.956 | 0.958 | 0.962 | 0.960 | 0.963 |
| FPN        | 0.974    | 0.974 | 0.975 | 0.965     | 0.958 | 0.962 | 0.959  | 0.962 | 0.961 | 0.962 | 0.960 | 0.962 |
| Linknet    | 0.975    | 0.974 | 0.975 | 0.967     | 0.955 | 0.959 | 0.963  | 0.963 | 0.963 | 0.965 | 0.959 | 0.961 |
| PSPNet     | 0.971    | 0.974 | 0.975 | 0.961     | 0.961 | 0.963 | 0.957  | 0.956 | 0.958 | 0.959 | 0.959 | 0.960 |
| PAN        | 0.972    | 0.975 | 0.976 | 0.963     | 0.965 | 0.967 | 0.958  | 0.955 | 0.956 | 0.961 | 0.960 | 0.962 |
| MA-Net     | 0.969    | 0.974 | 0.975 | 0.959     | 0.963 | 0.966 | 0.954  | 0.954 | 0.956 | 0.956 | 0.959 | 0.961 |

Table D2. Results of the COVID-19 segmentation networks (segmentation branch) in Stage II

| Model      | Accuracy |       |       | Precision |       |       | Recall |       |       | DSC   |       |       |
|------------|----------|-------|-------|-----------|-------|-------|--------|-------|-------|-------|-------|-------|
|            | Train    | Val   | Test  | Train     | Val   | Test  | Train  | Val   | Test  | Train | Val   | Test  |
| U-net      | 0.965    | 0.963 | 0.962 | 0.796     | 0.869 | 0.878 | 0.864  | 0.922 | 0.915 | 0.821 | 0.894 | 0.894 |
| U-net++    | 0.964    | 0.963 | 0.955 | 0.787     | 0.723 | 0.714 | 0.875  | 0.870 | 0.845 | 0.825 | 0.724 | 0.702 |
| DeepLabV3  | 0.892    | 0.903 | 0.911 | 0.966     | 1.000 | 1.000 | 0.021  | 0.462 | 0.500 | 0.016 | 0.462 | 0.500 |
| DeepLabV3+ | 0.952    | 0.961 | 0.954 | 0.731     | 0.795 | 0.775 | 0.818  | 0.831 | 0.793 | 0.769 | 0.811 | 0.780 |
| FPN        | 0.966    | 0.974 | 0.973 | 0.817     | 0.858 | 0.851 | 0.860  | 0.865 | 0.861 | 0.836 | 0.861 | 0.856 |
| Linknet    | 0.949    | 0.929 | 0.931 | 0.724     | 0.404 | 0.460 | 0.773  | 0.887 | 0.786 | 0.744 | 0.467 | 0.544 |
| PSPNet     | 0.945    | 0.965 | 0.962 | 0.677     | 0.863 | 0.726 | 0.818  | 0.876 | 0.826 | 0.738 | 0.869 | 0.771 |
| PAN        | 0.939    | 0.941 | 0.944 | 0.727     | 0.536 | 0.652 | 0.615  | 0.593 | 0.616 | 0.660 | 0.349 | 0.606 |
| MA-Net     | 0.964    | 0.967 | 0.961 | 0.788     | 0.876 | 0.724 | 0.860  | 0.876 | 0.868 | 0.818 | 0.874 | 0.733 |

Table D3. Results of the COVID-19 segmentation networks (classification branch) in Stage II

| Model      | Accuracy |       |       | Precision |       |       | Recall |       |       | F1    |       |       |
|------------|----------|-------|-------|-----------|-------|-------|--------|-------|-------|-------|-------|-------|
|            | Train    | Val   | Test  | Train     | Val   | Test  | Train  | Val   | Test  | Train | Val   | Test  |
| U-net      | 0.989    | 0.985 | 0.972 | 0.993     | 1.000 | 1.000 | 0.984  | 0.970 | 0.972 | 0.987 | 0.983 | 0.985 |
| U-net++    | 0.990    | 0.986 | 0.957 | 0.989     | 0.857 | 0.857 | 0.986  | 0.964 | 0.957 | 0.986 | 0.837 | 0.834 |
| DeepLabV3  | 0.558    | 0.608 | 0.621 | 0.489     | 1.000 | 1.000 | 0.282  | 0.462 | 0.500 | 0.265 | 0.462 | 0.500 |
| DeepLabV3+ | 0.965    | 0.958 | 0.938 | 0.983     | 0.988 | 1.000 | 0.930  | 0.895 | 0.827 | 0.954 | 0.936 | 0.898 |
| FPN        | 0.991    | 0.995 | 0.969 | 0.990     | 1.000 | 0.963 | 0.988  | 0.989 | 0.970 | 0.989 | 0.994 | 0.966 |
| Linknet    | 0.940    | 0.811 | 0.876 | 0.945     | 0.542 | 0.690 | 0.908  | 0.993 | 0.993 | 0.924 | 0.586 | 0.708 |
| PSPNet     | 0.964    | 0.948 | 0.938 | 0.958     | 1.000 | 1.000 | 0.952  | 0.902 | 0.885 | 0.954 | 0.946 | 0.935 |
| PAN        | 0.902    | 0.854 | 0.877 | 0.911     | 0.659 | 0.644 | 0.846  | 0.912 | 0.965 | 0.872 | 0.615 | 0.678 |
| MA-Net     | 0.984    | 0.993 | 0.934 | 0.981     | 1.000 | 0.859 | 0.978  | 0.969 | 0.922 | 0.978 | 0.982 | 0.824 |
