# Supplementary material
Source: PubMed Central journal article supplement (PMC9329463)
Supplement: 41598_2022_15013_MOESM5_ESM.pdf [file 41598_2022_15013_MOESM5_ESM.pdf]

**Appendix E.** Scoring performance estimated separately on COVID-19 and normal datasets

Table E1. Scoring performance estimated on the dataset of COVID-19 cases

| Stage I model | Stage II model | MAE      |            |         | RMSE     |            |         |
|---------------|----------------|----------|------------|---------|----------|------------|---------|
|               |                | Training | Validation | Testing | Training | Validation | Testing |
| DeepLabV3+    | U-net          | 0.75     | 0.79       | 0.80    | 1.03     | 1.04       | 1.06    |
|               | U-net++        | 1.01     | 1.00       | 0.95    | 1.45     | 1.31       | 1.39    |
|               | DeepLabV3      | 3.84     | 3.96       | 3.62    | 4.23     | 4.35       | 3.99    |
|               | DeepLabV3+     | 0.99     | 1.08       | 0.89    | 1.34     | 1.50       | 1.13    |
|               | FPN            | 0.76     | 0.83       | 0.73    | 1.05     | 1.08       | 1.05    |
|               | Linknet        | 0.92     | 1.06       | 0.89    | 1.24     | 1.45       | 1.26    |
|               | PSPNet         | 1.05     | 0.92       | 0.87    | 1.43     | 1.31       | 1.30    |
|               | PAN            | 1.11     | 1.06       | 1.18    | 1.53     | 1.32       | 1.65    |
|               | MA-Net         | 0.83     | 0.83       | 0.69    | 1.12     | 1.09       | 0.99    |
|               | BS-net         | 1.18     | 1.00       | 1.45    | 1.63     | 1.35       | 1.85    |
| COVID-Net-S   | 1.23           | 1.27     | 1.29       | 1.44    | 1.44     | 1.52       |         |

Table E2. Scoring performance estimated on the dataset of normal cases

| Stage I model | Stage II model | MAE      |            |         | RMSE     |            |         |
|---------------|----------------|----------|------------|---------|----------|------------|---------|
|               |                | Training | Validation | Testing | Training | Validation | Testing |
| DeepLabV3+    | U-net          | 0.00     | 0.00       | 0.00    | 0.00     | 0.00       | 0.00    |
|               | U-net++        | 0.00     | 0.00       | 0.03    | 0.00     | 0.00       | 0.22    |
|               | DeepLabV3      | 0.00     | 0.00       | 0.00    | 0.00     | 0.00       | 0.00    |
|               | DeepLabV3+     | 0.00     | 0.00       | 0.00    | 0.04     | 0.00       | 0.00    |
|               | FPN            | 0.02     | 0.01       | 0.10    | 0.17     | 0.11       | 0.50    |
|               | Linknet        | 0.01     | 0.10       | 0.03    | 0.17     | 0.58       | 0.22    |
|               | PSPNet         | 0.04     | 0.09       | 0.04    | 0.26     | 0.38       | 0.25    |
|               | PAN            | 0.15     | 0.17       | 0.09    | 0.60     | 0.67       | 0.43    |
|               | MA-Net         | 0.00     | 0.00       | 0.03    | 0.00     | 0.00       | 0.22    |
|               | BS-net         | 3.15     | 3.09       | 3.25    | 3.66     | 3.61       | 3.76    |
| COVID-Net-S   | 2.21           | 2.18     | 2.20       | 2.35    | 2.33     | 2.36       |         |
