# Supplementary material
Source: PubMed Central journal article supplement (PMC9329463)
Supplement: 41598_2022_15013_MOESM6_ESM.pdf [file 41598_2022_15013_MOESM6_ESM.pdf]

**Appendix F.** Visualization of the probability maps for the COVID-19 datasets

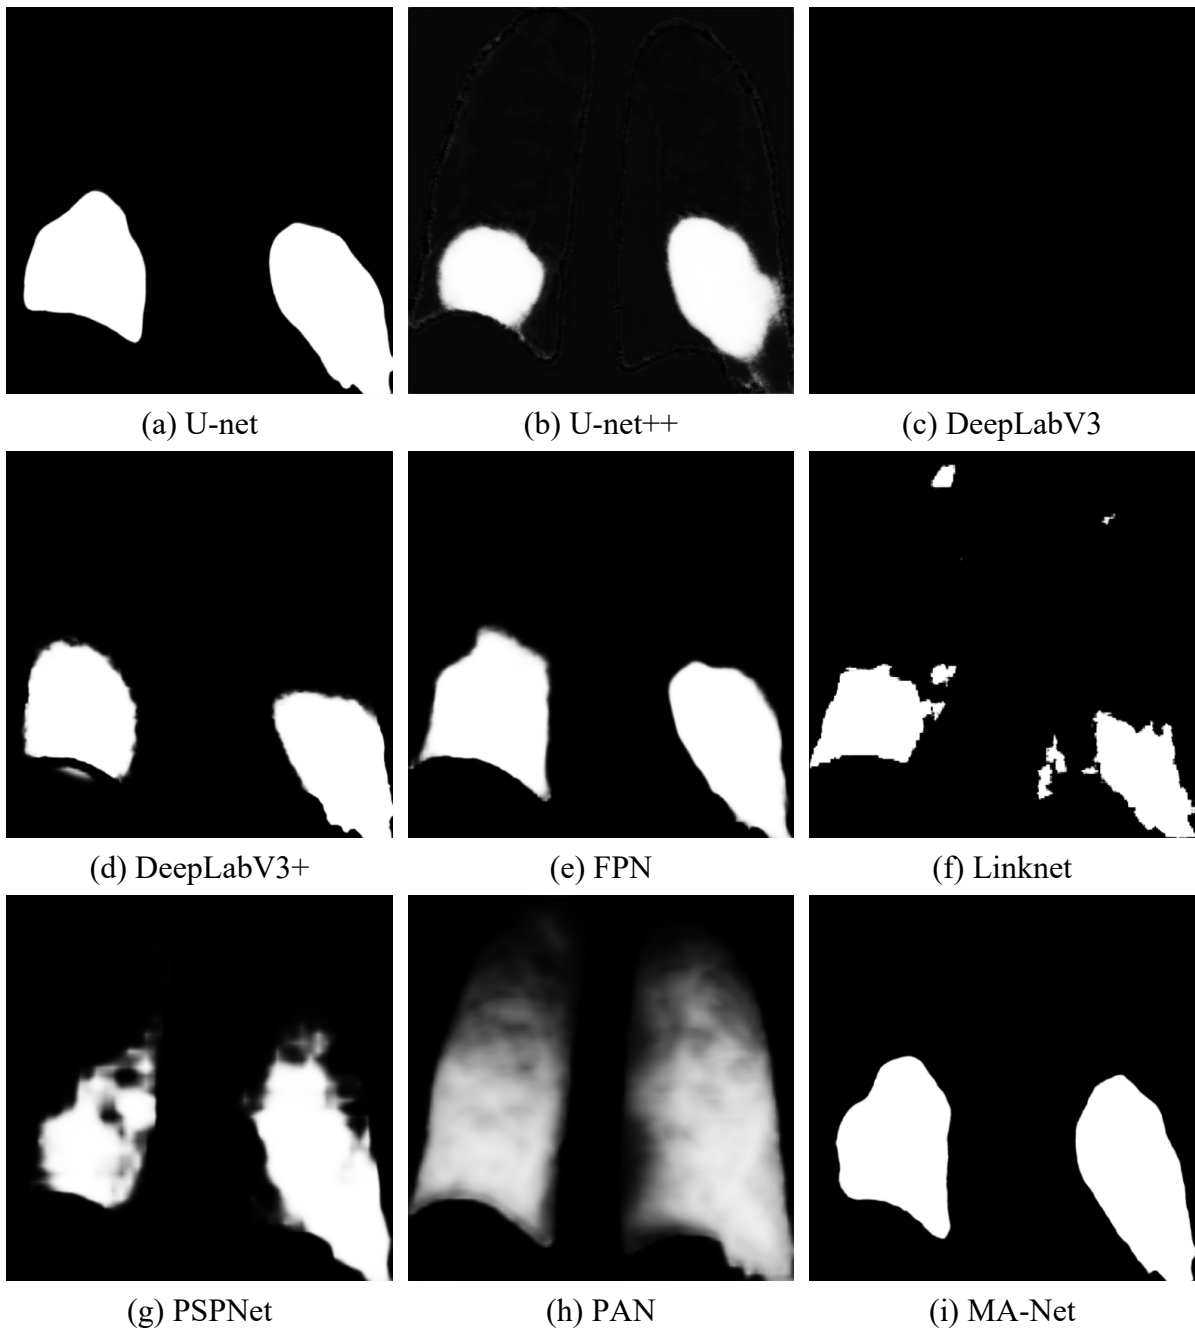

Figure F1. Comparison of the probability maps of a COVID-19 subject from the CRD dataset

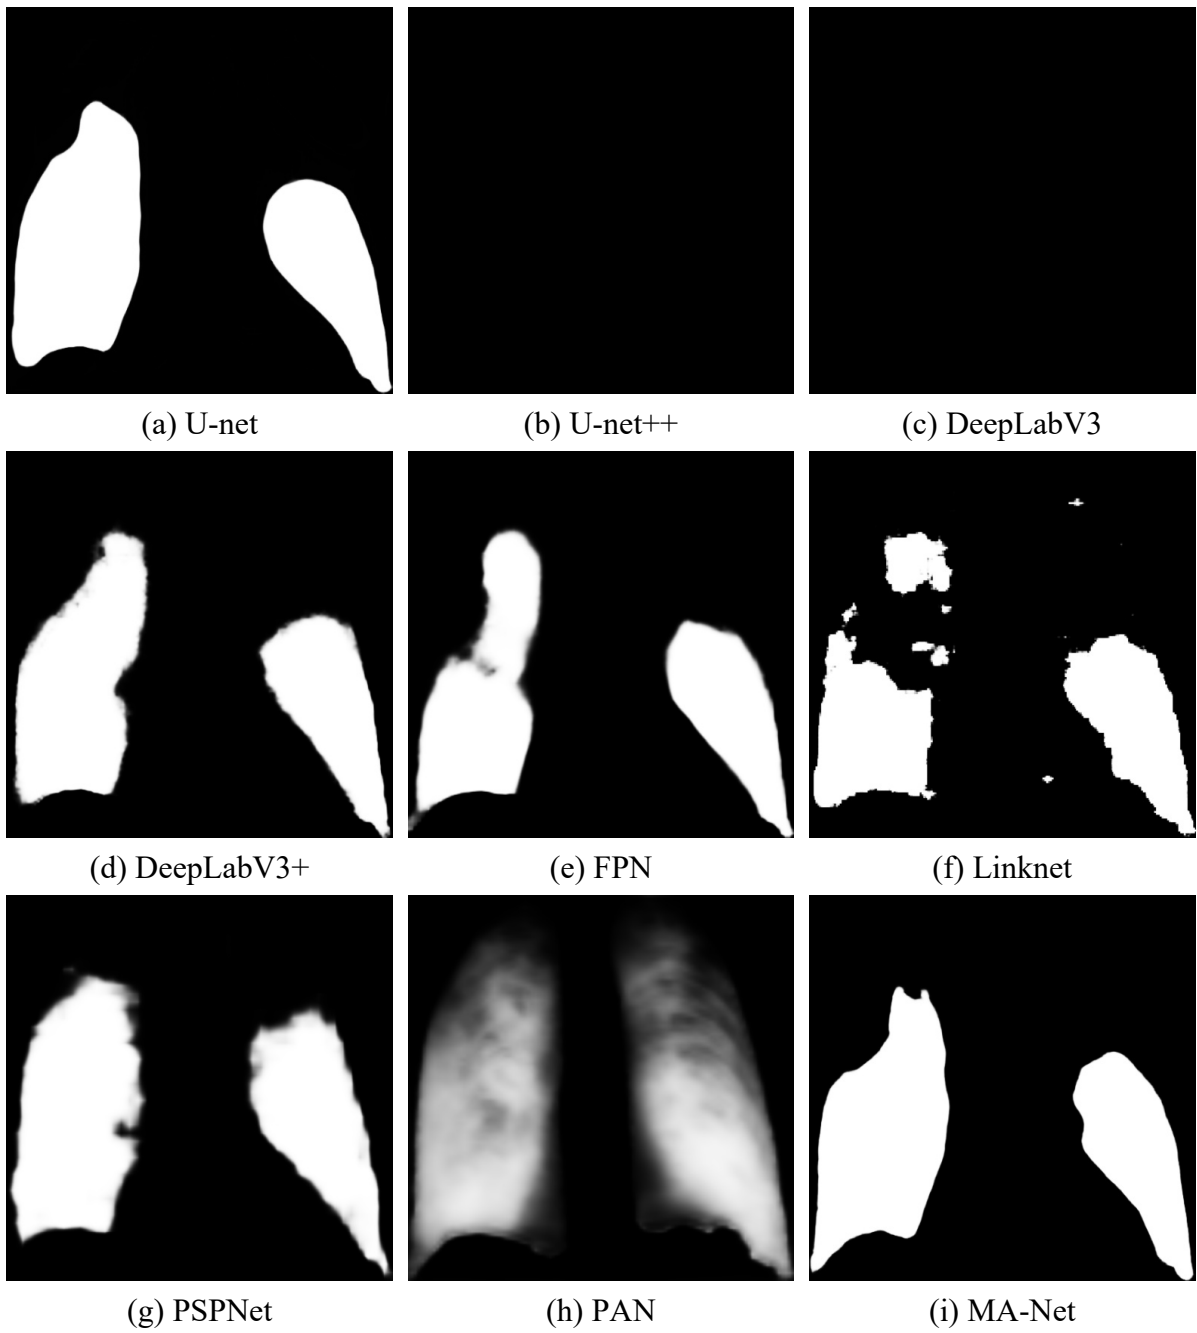

Figure F2. Comparison of the probability maps of a COVID-19 subject from the CCXD dataset

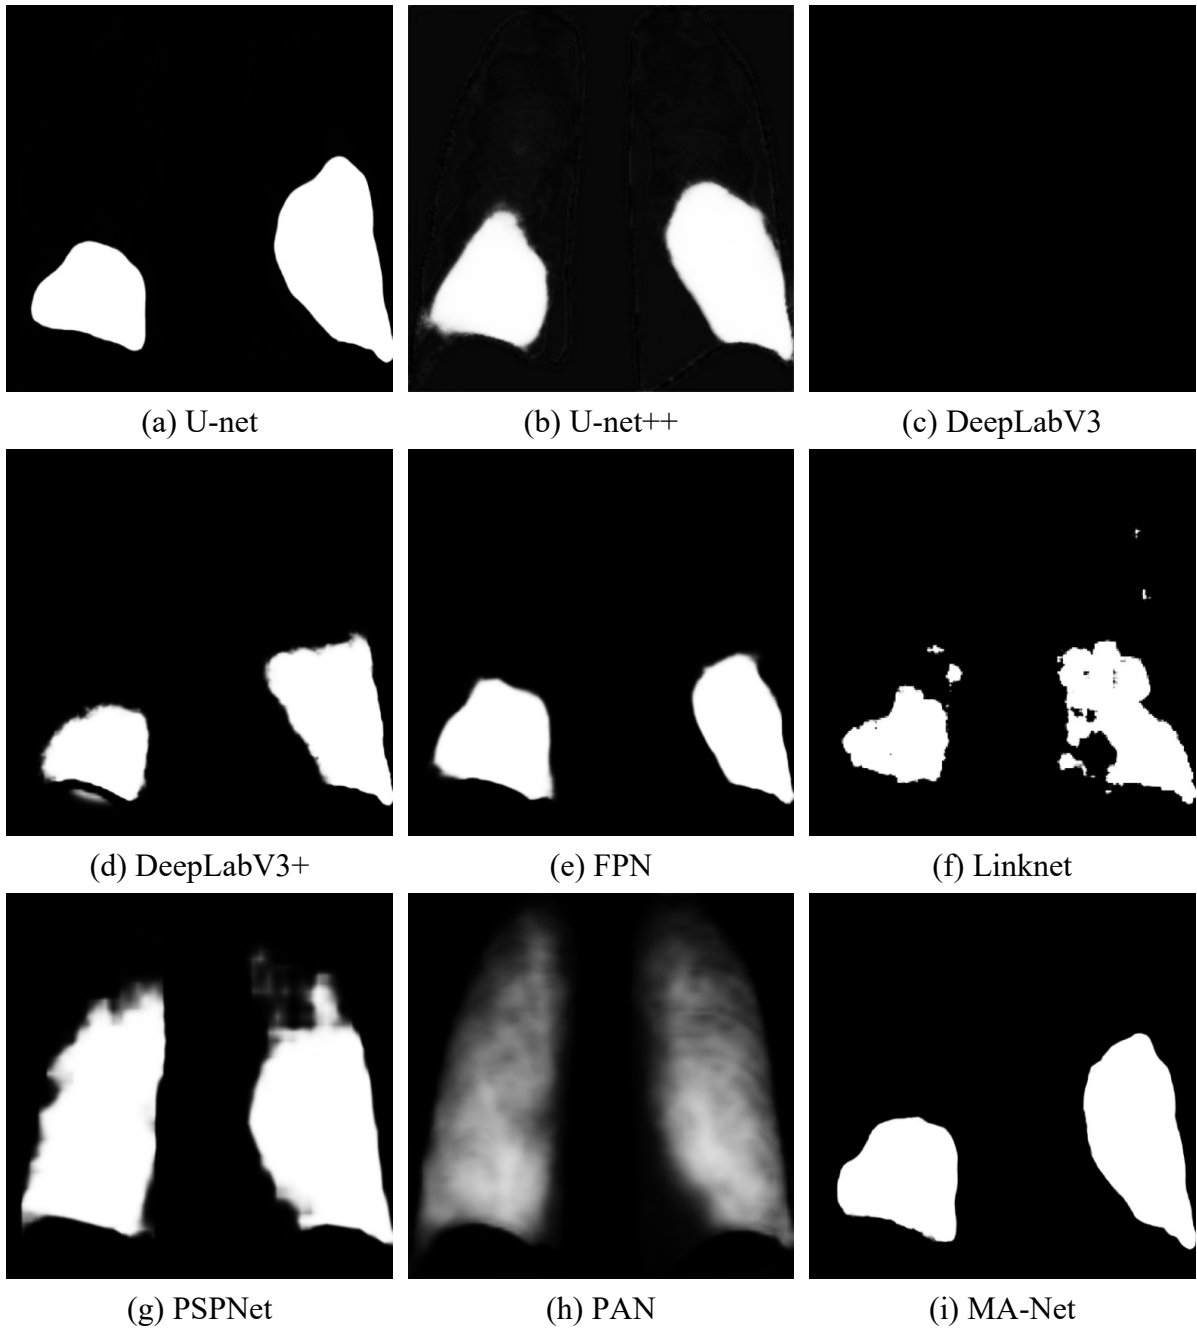

Figure F3. Comparison of the probability maps of a COVID-19 subject from the FCXD dataset
