# Supplementary material
Source: PubMed Central journal article supplement (PMC9329463)
Supplement: 41598_2022_15013_MOESM7_ESM.pdf [file 41598_2022_15013_MOESM7_ESM.pdf]

**Appendix G.** Visualization of the segmentation and scoring for COVID-19 datasets

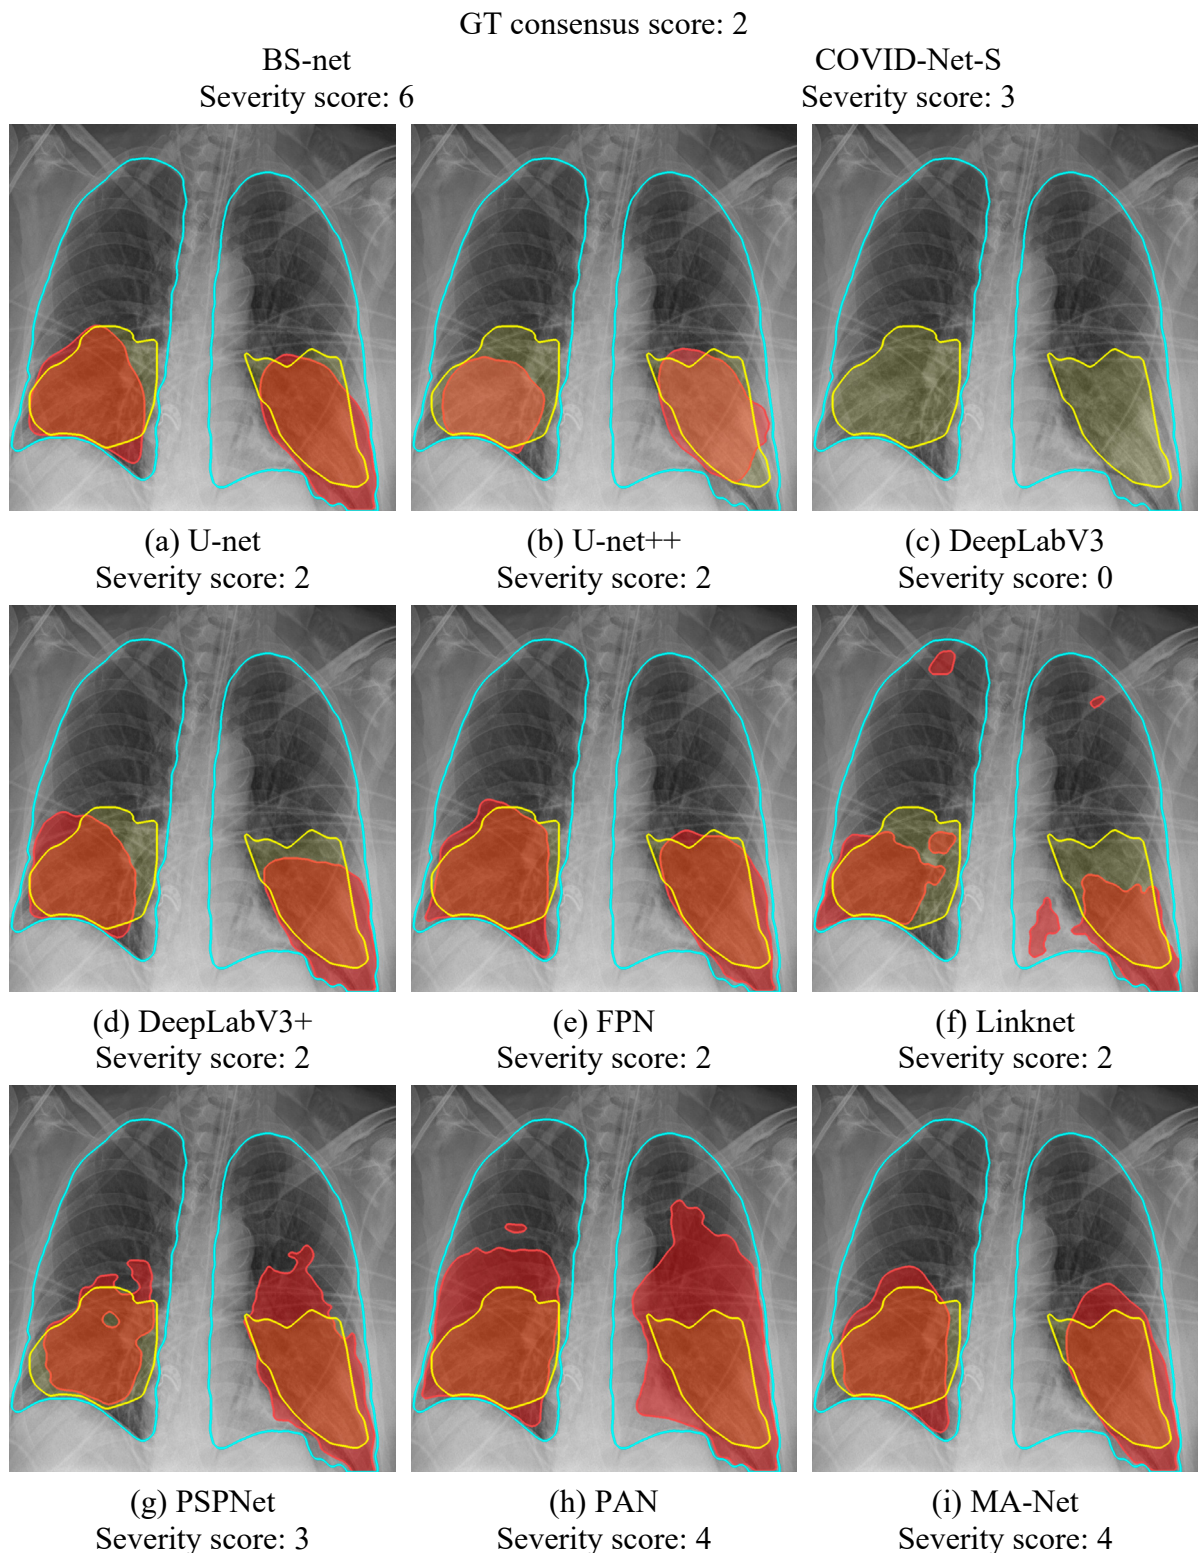

Figure G1. Comparison of the segmentation and severity score estimation of a COVID-19 subject from the CRD dataset. A cyan delineation refers to the lung segmentation obtained by Stage I; a red mask is a disease mask obtained by Stage II; a yellow mask refers to the ground-truth segmentation of the disease

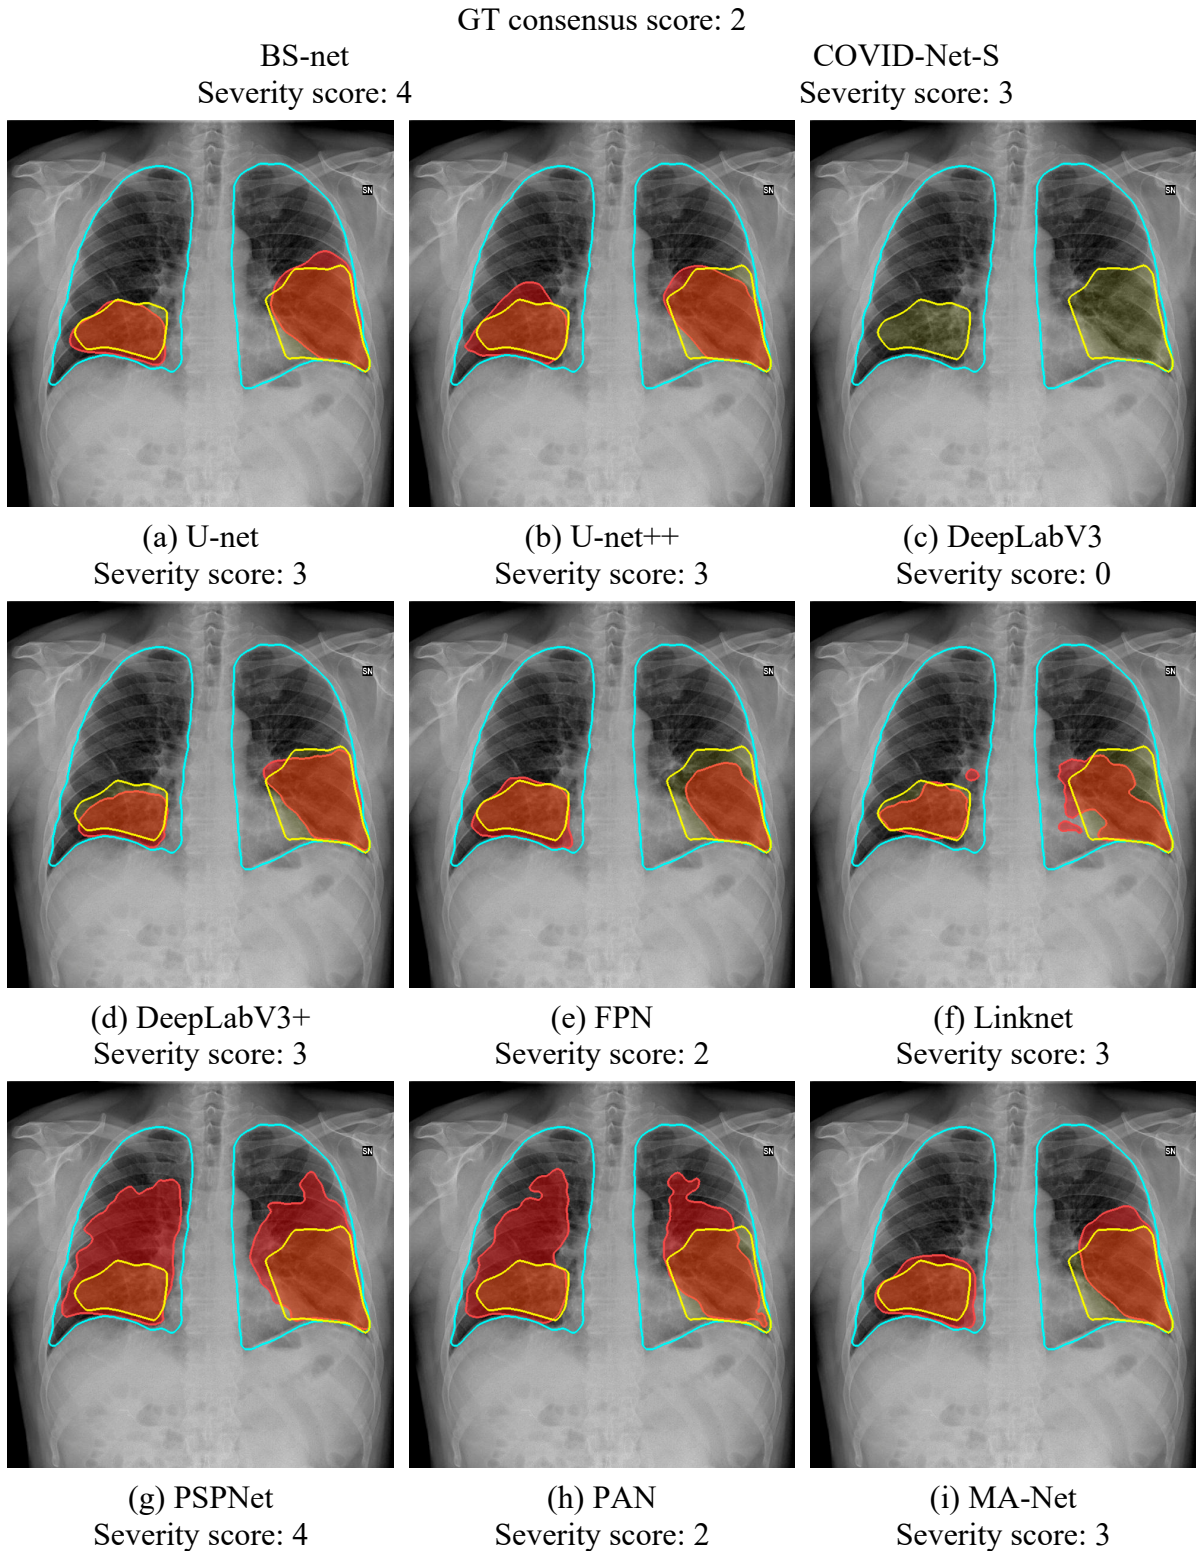

Figure G2. Comparison of the segmentation and severity score estimation of a COVID-19 subject from the FCXD dataset. A cyan delineation refers to the lung segmentation obtained by Stage I; a red mask is a disease mask obtained by Stage II; a yellow mask refers to the ground-truth segmentation of the disease

GT consensus score: 4.5

BS-net  
Severity score: 5

COVID-Net-S  
Severity score: 4

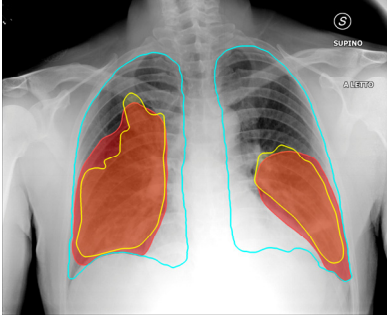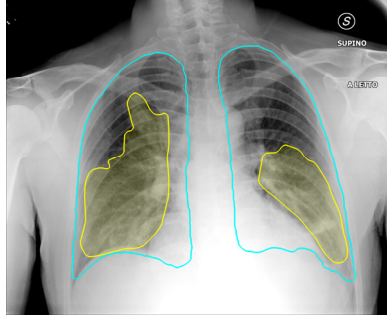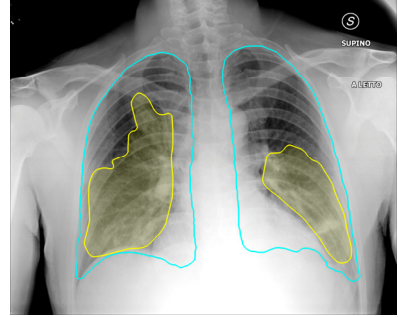

(a) U-net  
Severity score: 4

(b) U-net++  
Severity score: 0

(c) DeepLabV3  
Severity score: 0

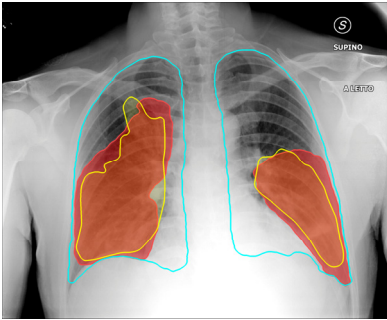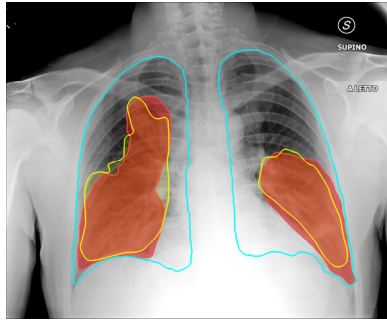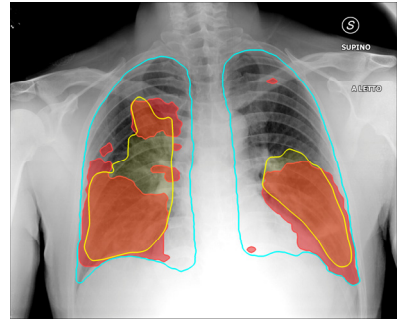

(d) DeepLabV3+  
Severity score: 4

(e) FPN  
Severity score: 4

(f) Linknet  
Severity score: 5

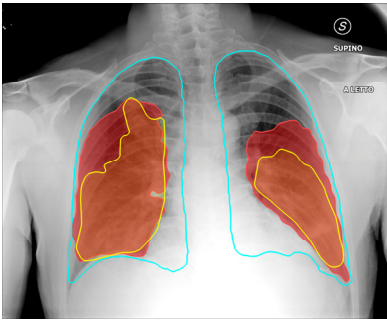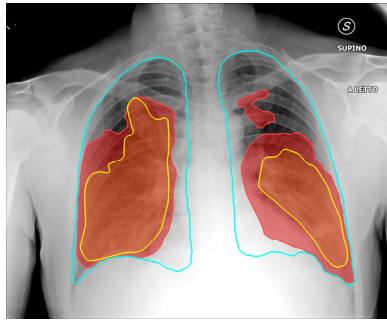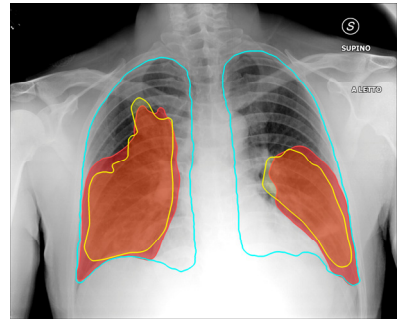

(g) PSPNet  
Severity score: 4

(h) PAN  
Severity score: 4

(i) MA-Net  
Severity score: 4

Figure G3. Comparison of the segmentation and severity score estimation of a COVID-19 subject from the CCXD dataset. A cyan delineation refers to the lung segmentation obtained by Stage I; a red mask is a disease mask obtained by Stage II; a yellow mask refers to the ground-truth segmentation of the disease
